# Supplementary material
Source: publisher figshare collection journal article supplement (https://frontiersin.figshare.com/ndownloader/files/28395957)
Supplement: Supplementary file [file 28395957]

## VII. APPENDIX

### Appendix A):

For each node of the UML we apply each of the keywords shown in Table 2 (upper), as suggested in the SHARD analysis . This gives 5 possible hazards for each node for a total of 20 nodes. Every guide word analysed against a node is referred to as an entry. For every entry a rudimentary hazard level is assigned, see Table 2 (lower), to raise awareness of the most important hazards to the reader.

| Guide Word | Definition                                                                           |
|------------|--------------------------------------------------------------------------------------|
| Omission   | The service is never delivered, i. e. there is no communication                      |
| Commission | A service is delivered when not required, i. e. there is an unexpected communication |
| Early      | The service (communication) occurs earlier than intended                             |
| Late       | The service (communication) occurs later than intended                               |
| Value      | The information (data) delivered has the wrong value                                 |

| Hazard Severity Level | Description                                                                                                                           |
|-----------------------|---------------------------------------------------------------------------------------------------------------------------------------|
| no hazard             | No safety related consequences                                                                                                        |
| annoyance             | No safety related consequences, but a loss of service performance that may cause annoyance (e.g. user waiting and becomes distracted) |
| low                   | Minor injury (discomfort, bruising)                                                                                                   |
| medium                | Moderate injury (small cut, abrasion)                                                                                                 |
| high                  | Serious injury (strain, sprain, incapacitated)                                                                                        |

Table 2: Guide words (upper) and hazard levels (lower) used in the analysis

## Appendix B)

The full human error analysis for the garment dressing scenario is shown in Table 3 below.

This table considered errors specific to the task segment as shown in Figure 3 a)

| Task   | Index | Description                    | Possible Causes                                | Effects                                                                                  | Detection & Protection                                                         | Justification or Design Recommendation                                                                          | Hazard Level |
|--------|-------|--------------------------------|------------------------------------------------|------------------------------------------------------------------------------------------|--------------------------------------------------------------------------------|-----------------------------------------------------------------------------------------------------------------|--------------|
| UEA 01 | S 01  | Wrong task initiated           | User said the wrong thing                      | Wrong task may be initiated                                                              | Take cues from other modalities                                                | Use multimodal input for high probability<br>Implement HRI if in doubt                                          | medium       |
| UEA 01 | S 02  | Forget key words               | User memory issues                             | Task not started                                                                         | Take cues from other modalities                                                | Use multimodal input for high probability<br>Implement HRI if in doubt                                          | annoyance    |
| UEA 01 | S 03  | Background noise interference  | TV or radio on, unintended agent               | Incorrect interpretation, unexpected robot behaviour                                     | Check initiation of task with other modalities                                 | Use multimodal input for high probability<br>Implement HRI if in doubt                                          | medium       |
| UEA 02 | S 04  | User occludes visual system    | User wanders in front of robot                 | User tracking lost                                                                       | System must stop any movement                                                  | Regain tracking or implement HRI                                                                                | low          |
| UEA 02 | S 05  | Shoe/jacket not available      | User picked or moved shoe                      | Garment tracking lost                                                                    | Use proximity sensors, tell user to not occlude/pick up garment or move around | Ask user where garment is                                                                                       | no hazard    |
| UEA 02 | S 06  | Wrong gesture given            | User confusion                                 | Incorrect interpretation                                                                 | Compare user intention from other modalities                                   | Ask user to confirm if ambiguity exists not resolvable by multimodal inputs                                     | low          |
| UEA 03 | S 07  | User collision course          | User loses balance                             | User at risk of injury                                                                   | Offer balance support or reminder to be seated                                 | Safety proximity sensors, compliance mode during all movement                                                   | high         |
| UEA 03 | S 08  | Shoe/jacket not available      | User picks up shoe/jacket                      | Task not started or pauses                                                               | Use proximity sensors, tell user to not occlude/pick up garment or move around | Ask user to confirm if ambiguity exists not resolvable by multimodal inputs                                     | annoyance    |
| UEA 03 | S 09  | User moves shoe/jacket         | User believes they are helping                 | Task segmentation lost                                                                   | Use proximity sensors, tell user to not occlude/pick up garment or move around | Ask user to remain still, confirm task segment through HRI if necessary                                         | low          |
| UEA 04 | S 10  | User takes shoe/jacket from EE | User pulls out of EE grip                      | EE moves with empty grip                                                                 | Use proximity sensors, tell user to not occlude/pick up garment or move around | Ask user to confirm if ambiguity exists not resolvable by multimodal inputs                                     | low          |
| UEA 04 | S 11  | User obstructs EE path         | User wanders in front of robot                 | Task not started, potential collision with EE                                            | Use proximity sensors, tell user to not occlude/pick up garment or move around | Robot pauses if user moves when in close proximity                                                              | high         |
| UEA 05 | S 12  | User moves                     | User loses balance                             | User at risk of injury                                                                   | Use proximity sensors, tell user to not occlude/pick up garment or move around | Prompt user to remain still at certain points and especially during movement                                    | medium       |
| UEA 05 | S 13  | User occluded                  | User moves behind environment article          | User tracking lost                                                                       | Use proximity sensors, tell user to not occlude/pick up garment or move around | If user tracking is lost use speech HRI                                                                         | no hazard    |
| UEA 05 | S 14  | Unsuitable pose                | User does not understand workspace limits      | Task not started or pauses                                                               | Use proximity sensors, tell user to not occlude/pick up garment or move around | Use speech based HRI to get user into more appropriate pose                                                     | no hazard    |
| UEA 05 | S 15  | Unintended agent               | 2nd actor enters stage                         | System tracks 2nd actor, system receives speech from 2nd actor, task not started, pauses | Ask if there is a 2nd actor or noise interference                              | Ask if there is a 2nd person in the room                                                                        | no hazard    |
| UEA 06 | S 16  | User moves                     | User loses balance, believe they are assisting | User tracking lost user injury                                                           | Tell user to not occlude/ pick up garment or move around                       | Implement a non-rigid trajectory that can track the user movement during dressing                               | medium       |
| UEA 06 | S 17  | User obstructs path            | User wanders in front of robot                 | User at risk of injury/collision task interrupted                                        | Use proximity sensors, tell user to not occlude/pick up garment or move around | Track user position and define boundary where user is alerted (alarm) and/or define an emergency stop procedure | high         |
| UEA 06 | S 18  | User out of range              | User wanders off                               | User tracking lost, task interrupted                                                     | Use proximity sensors, tell user to remain within range and in certain pose    | Track user position and define boundary where user is alerted out of functioning range of the robot             | no hazard    |
| UEA 07 | S 19  | User moves/ changes pose       | User loses balance, believe they are assisting | User tracking lost, task interrupted                                                     | Use proximity sensors, tell user to not occlude/pick up garment or move around | Robot must adapt to changes in user position, consideration to how the user may help the robot too              | medium       |

|        |      |                               |                                                |                                                                       |                                                                                 |                                                                                                                          |           |
|--------|------|-------------------------------|------------------------------------------------|-----------------------------------------------------------------------|---------------------------------------------------------------------------------|--------------------------------------------------------------------------------------------------------------------------|-----------|
| UEA 07 | S 20 | Foot/Arm out of range         | User does not understand workspace limits      | User tracking lost, task interrupted                                  | Use proximity sensors, tell user to remain within range and in certain pose     | Track user position and define boundary where user is alerted out of functioning range of the robot                      | low       |
| UEA 07 | S 21 | Wrong foot/arm presented      | Interpretation incorrect/confusion             | Incorrect user interpretation, garment incorrectly dressed            | Pose detection                                                                  | Use multimodal input for high probability<br>Implement HRI if in doubt                                                   | low       |
| UEA 07 | S 22 | User already wearing garment  | User confusion                                 | User struggles dressing, High force experienced                       | Visual recognition system or current user garment                               | Garment detection of existing clothing may be difficult and out of scope, suggest using HRI to confirm if there is doubt | medium    |
| UEA 08 | S 23 | User moves/ changes pose      | User loses balance, believe they are assisting | Potential injury, task interrupted                                    | Use proximity sensors, tell user to not occlude/ pick up garment or move around | Robot must adapt to changes in user position, consideration to how the user may help the robot too                       | high      |
| UEA 08 | S 24 | Foot/Arm out of range         | User does not understand workspace limits      | Task interrupted                                                      | Tell user to remain within range and in certain pose                            | Remind user they are out of range, show picture or project boundary onto the floor (e.g. laser line)                     | annoyance |
| UEA 08 | S 25 | User already wearing garment  | User confusion                                 | User struggles dressing, High force experienced                       | Visual recognition system or current user garment                               | Garment detection of existing clothing may be difficult and out of scope, suggest using HRI to confirm if there is doubt | medium    |
| UEA 08 | S 26 | Wrong feedback given          | User confusion                                 | Incorrect interpretation                                              | Compare inputs from other modalities                                            | Use multimodal input for high probability<br>Implement HRI if in doubt                                                   | medium    |
| UEA 09 | S 27 | User moves/ changes pose      | User loses balance, believe they are assisting | User at risk of injury/collision task interrupted                     | Use proximity sensors, tell user to not occlude/ pick up garment or move around | Robot must adapt to changes in user position, consideration to how the user may help the robot too                       | high      |
| UEA 10 | S 28 | User moves/ changes pose      | User loses balance, believe they are assisting | User at risk of injury/collision task interrupted                     | Use proximity sensors, tell user to not occlude/ pick up garment or move around | Robot must adapt to changes in user position, consideration to how the user may help the robot too                       | high      |
| UEA 10 | S 29 | User force too low            | User mobility issues                           | Task cannot be completed                                              | Use force detection                                                             | Use a force profile and lookup from user profile, if user force is too low may have to find external help (call someone) | low       |
| UEA 10 | S 30 | User interpretation incorrect | User confusion                                 | Incorrect interpretation                                              | Compare inputs from other modalities                                            | Use multimodal input for high probability<br>Implement HRI if in doubt                                                   | medium    |
| UEA 10 | S 31 | User override attempt         | User believes they are helping                 | User tracking lost, Garment tracking lost, System sequence disordered | Compare inputs from other modalities                                            | Use multimodal input for high probability<br>Implement HRI if in doubt                                                   | medium    |
| UEA 11 | S 32 | User moves/ changes pose      | User loses balance, believe they are assisting | User at risk of injury/collision task interrupted                     | Use proximity sensors, tell user to not occlude/ pick up garment or move around | Robot must adapt to changes in user position, consideration to how the user may help the robot too                       | high      |
| UEA 11 | S 32 | User override attempt         | User believes they are helping                 | User tracking lost, Garment tracking lost, System sequence disordered | Compare inputs from other modalities                                            | Use multimodal input for high probability<br>Implement HRI if in doubt                                                   | medium    |

Table 3: Full hazard analysis results for human error in a specific task segment.

## Appendix C)

The human hazard analysis for the garment dressing scenario is shown in Table 4 below. For this analysis For this analysis the hazards could occur in ant segment of the task as shown in Figure 3 b).

| Task   | Index | Description                                | Possible Causes                                                  | Effects                                                                                                      | Detection & Protection                                                                                      | Justification or Design Recommendation                                                                        | Hazard Level |
|--------|-------|--------------------------------------------|------------------------------------------------------------------|--------------------------------------------------------------------------------------------------------------|-------------------------------------------------------------------------------------------------------------|---------------------------------------------------------------------------------------------------------------|--------------|
| UEA 01 | C 01  | User changes mind                          | User updates decision based on new information or change of plan | User jumps to different task or segment of the task or task must stop                                        | Use HRI and multimodal user intention module                                                                | Use multimodal input for high probability<br>Implement HRI if in doubt                                        | medium       |
| UEA 02 | C 02  | User gives wrong command                   | User mis-spoke or was distracted                                 | Task may procede to a different segment that the user intended                                               | Confirm command input with user through HRI                                                                 | All commands to be reviewed bu user if they are of significant potential hazard, otherwise no action required | medium       |
| UEA 03 | C 03  | User wants different garment/shoe          | User indicated wrong garment or changes mind                     | User may get the wrong garment or fitted incorrectly                                                         | Tracking or Left and Right shoe types or garment type and be able to restart dressing sequence if requested | Exit and restart dressing sequence with different garment required                                            | no hazard    |
| UEA 04 | C 04  | User becomes impatient                     | User personality                                                 | System less likely to be used                                                                                | Perform actions in timely manner                                                                            | Ensure robot can act with suitable response times                                                             | annoyance    |
| UEA 05 | C 05  | User voice interrupts current process      | User personality to talk over others                             | User intention is misrepresented or system does not hear the recent request                                  | Listen for user voice even if talking                                                                       | Use of bidirectional communication or robot always stops talking if user interrupts                           | no hazard    |
| UEA 06 | C 06  | User gives unintended gesture              | User is distracted, 2nd actor                                    | May give unintended user intention                                                                           | Confirm gesture action if score low probability                                                             | Use probability weighting on single modality inputs                                                           | low          |
| UEA 07 | C 07  | User becomes distracted                    | External stimuli                                                 | User may collide with robot if moving                                                                        | Monitor user attention                                                                                      | User attention should have direct interface with safety critical system responses                             | high         |
| UEA 08 | C 08  | User gives the wrong feedback to the robot | Robot communication not clear                                    | User may collide with robot if moving, get into the wrong task segment by misinterpreting the robots command | Give clear commands and supplement with on screen display where appropriate                                 | Give mulitple outputs to user when communicating                                                              | medium       |

**Table 4: Full hazard analysis results for human error common to any task segment.**

## Appendix D)

The robot hazard analysis for the garment dressing scenario is shown in Table 5 below.

For this analysis the hazards are mapped onto the system UML diagram shown in Figure 4

| UML Task | Index | Guide Word | Deviation                                                              | Possible Causes                                                                            | Effects                                                  | Detection & Protection                             | Justification or Design Recommendation                                                                         | Hazard Level |
|----------|-------|------------|------------------------------------------------------------------------|--------------------------------------------------------------------------------------------|----------------------------------------------------------|----------------------------------------------------|----------------------------------------------------------------------------------------------------------------|--------------|
| UML 01   | R 01  | Omission   | Request not received                                                   | - Microphone not working<br>- Activation word not in vocabulary<br>- Voice not loud enough | Dressing task not initiated                              | User testing                                       | - good microphone<br>- good speech API<br>- directional microphone                                             | no hazard    |
| UML 01   | R 02  | Commission | Request starts without authorisation                                   | Background noise or voice misinterpreted                                                   | Task initiated                                           |                                                    | 2 stage task initiation verification                                                                           | annoyance    |
| UML 01   | R 03  | Early      | n/a                                                                    | n/a                                                                                        | n/a                                                      | n/a                                                | n/a                                                                                                            | no hazard    |
| UML 01   | R 04  | Late       | Request takes long to process/ respond                                 | CPU power or poor coding                                                                   | User annoyance/ distraction                              | Timer checks in code and hardware testing          | Implement timer checks in code to prevent long/infinite loops                                                  | annoyance    |
| UML 01   | R 05  | Value      | Wrong garment is inferred by robot                                     | Interpretation of spoken words                                                             | Stuck in loop, robot may be moving while searching       | Timer checks, implement user interaction           | - Implement timer checks in code to prevent long/infinite loops<br>- Interact with user if task is taking long | annoyance    |
| UML 02   | R 06  | Omission   | Process will halt                                                      | - garment not in visual vocabulary<br>- cannot find garment                                | Dressing task will interrupt                             | Timer checks, implement user interaction           | - check for long/infinite loops<br>- Implement HRI assistance                                                  | annoyance    |
| UML 02   | R 07  | Commission | Robot will look for garment without user request                       | Wrong interpretation of user voice or background noise                                     | Robot may start moving without user's request/ knowledge | user request flag                                  | 2 stage flag verification of user request                                                                      | low          |
| UML 02   | R 08  | Early      | n/a                                                                    | n/a                                                                                        | n/a                                                      | n/a                                                | n/a                                                                                                            | no hazard    |
| UML 02   | R 09  | Late       | Request takes long to process/ respond                                 | CPU power or poor coding                                                                   | User could become distracted and forget robot is moving  | Timer checks in code, announce to user when moving | - Sounder when robot is moving<br>- reminder to user that the robot is undertaking a specific task             | annoyance    |
| UML 02   | R 10  | Value      | Robot doesn't look for garment or looks for non-requested garment      | - Process flow from request not complete<br>- Interpretation of user request               | - robot may fetch wrong garment<br>- robot may hang      | User interaction                                   | Implement HRI for garment verification with picture on screen/ or spoken                                       | annoyance    |
| UML 03   | R 11  | Omission   | Robot never finds garment                                              | Vision sensors issue, obstruction, item does not exist                                     | user waiting                                             | watchdog timer                                     | - Implement timer checks in code to prevent long/infinite loops<br>- Interact with user if task is taking long | annoyance    |
| UML 03   | R 12  | Commission | Robot finds item incorrectly (logic error)                             | logic/ programming fault, software bug                                                     | robot will fetch item not there                          | check logic with other modalities, use HRI         | 2 stage task initiation verification                                                                           | no hazard    |
| UML 03   | R 13  | Early      | Systems gets valid logic on node prior to completions of previous node | logic/ programming fault, software bug                                                     | robot will fetch item before request validated           | check logic with other modalities, use HRI         | 2 stage task initiation verification                                                                           | no hazard    |
| UML 03   | R 14  | Late       | System delay in getting confirmation                                   | CPU overloaded, sensor latency                                                             | user waiting                                             | watchdog timer                                     | - Implement timer checks in code to prevent long/infinite loops<br>- Interact with user if task is taking long | annoyance    |
| UML 03   | R 15  | Value      | Robot finds item incorrectly                                           | logic/ programming fault, software bug                                                     | robot will fetch item not there                          | check logic with other modalities, use HRI         | 2 stage task initiation verification                                                                           | no hazard    |
| UML 04   | R 16  | Omission   | Garment not picked up                                                  | robot/motor fault, cannot plan movement, sensor failure                                    | user may get distracted/irritated                        | timer/HRI                                          | - Implement timer checks in code to prevent long/infinite loops<br>- Interact with user if task is taking long | annoyance    |

|        |      |            |                                                      |                                                               |                                                     |                                         |                                                                                                                |           |
|--------|------|------------|------------------------------------------------------|---------------------------------------------------------------|-----------------------------------------------------|-----------------------------------------|----------------------------------------------------------------------------------------------------------------|-----------|
| UML 04 | R 17 | Commission | Garment picked up without request made               | logic failure, sensor failure/ interpretation error           | user not expecting movement                         | Use HRI before movement                 | 2 stage task initiation verification                                                                           | high      |
| UML 04 | R 18 | Early      | Garment picked up prior to request validated         | logic failure, sensor failure/ interpretation error           | user not expecting movement                         | Use HRI before movement                 | 2 stage task initiation verification                                                                           | high      |
| UML 04 | R 19 | Late       | Garment picked up after request made (delay)         | CPU overloaded, sensor latency                                | user may get distracted                             |                                         | - Implement timer checks in code to prevent long/infinite loops<br>- Interact with user if task is taking long | annoyance |
| UML 04 | R 20 | Value      | Wrong movement, wrong garment                        | logic failure, sensor failure/ interpretation error           | robot may move EE into path of user                 | Use HRI before movement                 | 2 stage task initiation verification                                                                           | high      |
| UML 05 | R 21 | Omission   | n/a                                                  | n/a                                                           | n/a                                                 | n/a                                     | n/a                                                                                                            | n/a       |
| UML 05 | R 22 | Commission | n/a                                                  | n/a                                                           | n/a                                                 | n/a                                     | n/a                                                                                                            | n/a       |
| UML 05 | R 23 | Early      | n/a                                                  | n/a                                                           | n/a                                                 | n/a                                     | n/a                                                                                                            | n/a       |
| UML 05 | R 24 | Late       | n/a                                                  | n/a                                                           | n/a                                                 | n/a                                     | n/a                                                                                                            | n/a       |
| UML 05 | R 25 | Value      | n/a                                                  | n/a                                                           | n/a                                                 | n/a                                     | n/a                                                                                                            | n/a       |
| UML 06 | R 26 | Omission   | n/a                                                  | n/a                                                           | n/a                                                 | n/a                                     | n/a                                                                                                            | n/a       |
| UML 06 | R 27 | Commission | n/a                                                  | n/a                                                           | n/a                                                 | n/a                                     | n/a                                                                                                            | n/a       |
| UML 06 | R 28 | Early      | n/a                                                  | n/a                                                           | n/a                                                 | n/a                                     | n/a                                                                                                            | n/a       |
| UML 06 | R 29 | Late       | n/a                                                  | n/a                                                           | n/a                                                 | n/a                                     | n/a                                                                                                            | n/a       |
| UML 06 | R 30 | Value      | n/a                                                  | n/a                                                           | n/a                                                 | n/a                                     | n/a                                                                                                            | n/a       |
| UML 07 | R 31 | Omission   | n/a                                                  | n/a                                                           | n/a                                                 | n/a                                     | n/a                                                                                                            | n/a       |
| UML 07 | R 32 | Commission | n/a                                                  | n/a                                                           | n/a                                                 | n/a                                     | n/a                                                                                                            | n/a       |
| UML 07 | R 33 | Early      | n/a                                                  | n/a                                                           | n/a                                                 | n/a                                     | n/a                                                                                                            | n/a       |
| UML 07 | R 34 | Late       | n/a                                                  | n/a                                                           | n/a                                                 | n/a                                     | n/a                                                                                                            | n/a       |
| UML 07 | R 35 | Value      | n/a                                                  | n/a                                                           | n/a                                                 | n/a                                     | n/a                                                                                                            | n/a       |
| UML 08 | R 36 | Omission   | Process will not start as user not detected          | Proximity sensor failure, detection module failure            | User not detected                                   | Sensor testing in suitable environments | Use multiple sensors or multimodal                                                                             | no hazard |
| UML 08 | R 37 | Commission | Process will continue when user is not there         | Proximity sensor failure, detection module failure            | User detected when not there                        | Sensor testing in suitable environments | Use multiple sensors or multimodal                                                                             | low       |
| UML 08 | R 38 | Early      | n/a                                                  | -                                                             | -                                                   | -                                       | -                                                                                                              | no hazard |
| UML 08 | R 39 | Late       | Pose detection starts late                           | CPU overloaded, sensor latency                                | user has to wait longer for pose detection to start | multiple testing                        | watchdog timers                                                                                                | annoyance |
| UML 08 | R 40 | Value      | Binary output, cannot vary                           | -                                                             | -                                                   | -                                       | -                                                                                                              | no hazard |
| UML 09 | R 41 | Omission   | User pose not detected                               | Sensor failure                                                | Possible halt to process                            | multiple testing                        | Use multiple sensors or multimodal, implement HRI on timer                                                     | annoyance |
| UML 09 | R 42 | Commission | User pose found but invalid                          | Sensor failure, image distortion                              | Trajectory planning will use invalid information    | multiple testing, multiple inputs       | Use multiple sensors or multimodal, implement HRI on timer                                                     | high      |
| UML 09 | R 43 | Early      | n/a                                                  | -                                                             | -                                                   |                                         |                                                                                                                | no hazard |
| UML 09 | R 44 | Late       | Pose detected late                                   | CPU overloaded, sensor latency                                | User waiting                                        | set time limits to maximum wait period  | watchdog timers                                                                                                | annoyance |
| UML 09 | R 45 | Value      | Wrong pose detected                                  | Sensor failure, image distortion                              | Trajectory planning will use invalid information    | multiple testing, multiple inputs       | Use multiple sensors or multimodal, implement HRI on timer                                                     | high      |
| UML 10 | R 46 | Omission   | User pose not detected                               | Sensor failure                                                | Possible halt to process                            | multiple testing                        | Use multiple sensors or multimodal, implement HRI on timer                                                     | annoyance |
| UML 10 | R 47 | Commission | User pose found but invalid                          | Sensor failure, image distortion                              | Trajectory planning will use invalid information    | multiple testing, multiple inputs       | Use multiple sensors or multimodal, implement HRI on timer                                                     | high      |
| UML 10 | R 48 | Early      | n/a                                                  | -                                                             | -                                                   |                                         |                                                                                                                | no hazard |
| UML 10 | R 49 | Late       | Pose detected late                                   | CPU overloaded, sensor latency                                | User waiting                                        | set time limits to maximum wait period  | watchdog timers                                                                                                | annoyance |
| UML 10 | R 50 | Value      | Wrong pose detected                                  | Sensor failure, image distortion                              | Trajectory planning will use invalid information    | multiple testing, multiple inputs       | Use multiple sensors or multimodal, implement HRI on timer                                                     | high      |
| UML 11 | R 51 | Omission   | Trajectory cannot be planned                         | Pose data never arrived                                       | User is waiting                                     | timer                                   | watchdog timers                                                                                                | annoyance |
| UML 11 | R 52 | Commission | Trajectory data obtained but may be invalid or false | False pose information received from 2nd actor or environmnet | Robot may collide with user                         | additional sensors                      | Must validated pose through multimodal or HRI interaction                                                      | high      |

|        |      |            |                                                                                |                                                               |                                                               |                                                                           |                                                                                                      |           |
|--------|------|------------|--------------------------------------------------------------------------------|---------------------------------------------------------------|---------------------------------------------------------------|---------------------------------------------------------------------------|------------------------------------------------------------------------------------------------------|-----------|
| UML 11 | R 53 | Early      | Trajectory data obtained but may be invalid or false on wrong pose information | False pose information received from 2nd actor or environmnet | Robot may collide with user                                   | additional sensors                                                        | Must validated pose through multimodal or HRI interaction                                            | high      |
| UML 11 | R 54 | Late       | Trajectory information takes a long time to be received                        | CPU overloaded, sensor latency                                | User is waiting                                               | timer                                                                     | watchdog timers                                                                                      | annoyance |
| UML 11 | R 55 | Value      | The wrong trajectory is planned                                                | False pose information received from 2nd actor or environmnet | Robot may collide with user                                   | additional sensors                                                        | Must validated pose through multimodal or HRI interaction                                            | high      |
| UML 12 | R 56 | Omission   | Trajectory cannot be planned                                                   | Pose data never arrived                                       | User is waiting                                               | timer                                                                     | watchdog timers                                                                                      | annoyance |
| UML 12 | R 57 | Commission | Trajectory data obtained but may be invalid or false                           | False pose information received from 2nd actor or environmnet | Robot may collide with user                                   | additional sensors                                                        | Must validated pose through multimodal or HRI interaction                                            | high      |
| UML 12 | R 58 | Early      | Trajectory data obtained but may be invalid or false on wrong pose information | False pose information received from 2nd actor or environmnet | Robot may collide with user                                   | additional sensors                                                        | Must validated pose through multimodal or HRI interaction                                            | high      |
| UML 12 | R 59 | Late       | Trajectory information takes a long time to be received                        | CPU overloaded, sensor latency                                | User is waiting                                               | timer                                                                     | watchdog timers                                                                                      | annoyance |
| UML 12 | R 60 | Value      | The wrong trajectory is planned                                                | False pose information received from 2nd actor or environmnet | Robot may collide with user                                   | additional sensors                                                        | Must validated pose through multimodal or HRI interaction                                            | high      |
| UML 13 | R 61 | Omission   | Garment is not moved                                                           | Robot jammed, garment stuck, safety lock out                  | User waits                                                    | information flow check                                                    | watchdog timers                                                                                      | annoyance |
| UML 13 | R 62 | Commission | Garment moves with unexpected timing                                           | False modality input(s)                                       | Garment starts moving when user does not expect it            | Movement required HRI confirmation                                        | Safety checking on modality inputs prior to any movement                                             | high      |
| UML 13 | R 63 | Early      | Garment moves before trajectory is valid                                       | False modality input(s)                                       | Garment starts moving when user does not expect it            | Movement required HRI confirmation                                        | Safety checking on modality inputs prior to any movement                                             | high      |
| UML 13 | R 64 | Late       | Garment moves but after a period of delay                                      | CPU load causes delay                                         | User waits then garment starts moving                         | User may start to move and then collide when robot starts moving again    | Safety checking on modality inputs prior to any movement                                             | medium    |
| UML 13 | R 65 | Value      | Garment moves in wrong direction or other movement error                       | False modality input(s)                                       | Movement is unexpected                                        | Movement required HRI confirmation                                        | Safety checking on modality inputs prior to any movement                                             | high      |
| UML 14 | R 66 | Omission   | Fault not detected                                                             | faulty sensor(s), incorrect sensor interpretation             | Robot continues without notification of fault                 | HRI or learning                                                           | System should be sensitive to single modality errors until it can adapt to user                      | high      |
| UML 14 | R 67 | Commission | Fault detected (false positive)                                                | unexpected sensor input                                       | Fault process enacted when there is no fault                  | Robot may stop or move slowly when it thinks there is an error            | False positives may be the result of unexpected user movements, a learning profile may help mitigate | annoyance |
| UML 14 | R 68 | Early      | Fault detected (false positive)                                                | n/a                                                           | n/a                                                           | n/a                                                                       | n/a                                                                                                  | no hazard |
| UML 14 | R 69 | Late       | Fault detected (data arrives late)                                             | CPU overloaded, sensor latency                                | Fault acted upon with delay                                   | User may struggle while system responds, catch with HRI or other modality | Must check errors through multimodal or HRI interaction                                              | high      |
| UML 14 | R 70 | Value      | Wrong fault detected                                                           | faulty sensor(s), incorrect sensor interpretation             | Wrong fault correction initiated                              | Robot performs wrong correction procedure                                 | Must check errors through multimodal or HRI interaction                                              | medium    |
| UML 15 | R 71 | Omission   | HRI request ignored                                                            | User not heard (speech)                                       | Robot may continue to enact on previous command ignoring user | Give user feedback on requests made                                       | Make inputs sensitive, user to wear headset to remove b/g noise                                      | medium    |

|        |      |            |                                                              |                                                                   |                                                                                      |                                                              |                                                                              |           |
|--------|------|------------|--------------------------------------------------------------|-------------------------------------------------------------------|--------------------------------------------------------------------------------------|--------------------------------------------------------------|------------------------------------------------------------------------------|-----------|
| UML 15 | R 72 | Commission | HRI request initiated (false request)                        | Wrong interpretation of background noise or 2nd actor             | Robot may change behaviour (unexpected)                                              | Give user feedback on requests made                          | Robot to stop and ask question                                               | annoyance |
| UML 15 | R 73 | Early      | HRI request initiated (false request)                        | Wrong interpretation of background noise or 2nd actor             | Robot may change behaviour (unexpected)                                              | Give user feedback on requests made                          | Robot to stop and ask question                                               | annoyance |
| UML 15 | R 74 | Late       | HRI request received late                                    | CPU overloaded, sensor latency                                    | Robot may not change behaviour as expected by user                                   | Give user feedback on requests made                          | Check with user before performing potentially harmful actions                | high      |
| UML 15 | R 75 | Value      | Wrong HRI interpretation                                     | Speech interpretation module failure, gesture recognition failure | Robot will perform unexpected action                                                 | Give user feedback on requests made                          | Check with user before performing potentially harmful actions                | high      |
| UML 16 | R 76 | Omission   | Roboto continues to dress after completion                   | Wrong trajectory, faulty sensor(s), wrong sensor interpretation   | May result in excessive force                                                        | Multimodal inputs to check completion                        | Check finish point using multiple inputs where possible, use HRI if doubtful | high      |
| UML 16 | R 77 | Commission | Dressing finishes early                                      | Wrong trajectory, faulty sensor(s), wrong sensor interpretation   | garment not on user properly, e.g. user may lose balance with shoe improperly fitted | Multimodal inputs to check completion                        | Check finish point using multiple inputs where possible, use HRI if doubtful | low       |
| UML 16 | R 78 | Early      | Dressing finishes early                                      | Wrong trajectory, faulty sensor(s), wrong sensor interpretation   | garment not on user properly                                                         | Multimodal inputs to check completion                        | Check finish point using multiple inputs where possible, use HRI if doubtful | low       |
| UML 16 | R 79 | Late       | Robot still operating but user believes dressing is complete | Robot continues to dress after completion                         | May result in excessive force                                                        | Multimodal inputs to check completion                        | Check finish point using multiple inputs where possible, use HRI if doubtful | high      |
| UML 16 | R 80 | Value      | n/a binary output                                            | n/a                                                               | n/a                                                                                  | n/a                                                          | n/a                                                                          | no hazard |
| UML 17 | R 81 | Omission   | Robot does not detect garment snagging                       | Wrong force tolerance, sensor failure                             | Robot keeps moving with snagging error                                               | Low sensor thresholds for snagging                           | Use low threshold values until stable learning data collected for user       | high      |
| UML 17 | R 82 | Commission | Robot falsely detects garment snagging                       | Faulty sensor(s), wrong sensor interpretation                     | Robot stops and asks question about snagging when there is no issue                  | Create learning dataset for errors to reduce false positives | Add error conditions to user profile                                         | no hazard |
| UML 17 | R 83 | Early      | n/a                                                          | n/a                                                               | n/a                                                                                  | n/a                                                          | n/a                                                                          | no hazard |
| UML 17 | R 84 | Late       | Robot does not detect garment snagging in time               | Faulty sensor(s), wrong sensor interpretation                     | Robot keeps moving with snagging error                                               | Low sensor thresholds for snagging                           | Give priority to error detection in software architecture                    | high      |
| UML 17 | R 85 | Value      | n/a                                                          | n/a                                                               | n/a                                                                                  | n/a                                                          | n/a                                                                          | no hazard |
| UML 18 | R 86 | Omission   | System does not recognise the need for new trajectory        | Pose data never arrived                                           | User is waiting                                                                      | timer                                                        | watchdog timers                                                              | annoyance |
| UML 18 | R 87 | Commission | System believes need for new trajectory (falsely)            | False pose information received from 2nd actor or environmnet     | Robot may collide with user                                                          | additional sensors                                           | Must validated pose through multimodal or HRI interaction                    | high      |
| UML 18 | R 88 | Early      | New trajectory requested before pose is determined           | False pose information received from 2nd actor or environmnet     | Robot may collide with user                                                          | additional sensors                                           | Must validated pose through multimodal or HRI interaction                    | high      |
| UML 18 | R 89 | Late       | Trajectory information takes a long time to be received      | CPU overloaded, sensor latency                                    | User is waiting                                                                      | timer                                                        | watchdog timers                                                              | annoyance |
| UML 18 | R 90 | Value      | The wrong trajectory is planned                              | False pose information received from 2nd actor or environmnet     | Robot may collide with user                                                          | additional sensors                                           | Must validated pose through multimodal or HRI interaction                    | high      |
| UML 19 | R 91 | Omission   | System does not recognise the need for new pose              | Sensor failure                                                    | Possible halt to process                                                             | multiple testing                                             | Use multiple sensors or multimodal, implement HRI on timer                   | annoyance |
| UML 19 | R 92 | Commission | System believes new user pose needed                         | Sensor failure, image distortion                                  | Trajectory planning will use invalid information, potential collision                | multiple testing, multiple inputs                            | Use multiple sensors or multimodal, implement HRI on timer                   | high      |
| UML 19 | R 93 | Early      | System believes new user pose needed                         | Sensor failure, image distortion                                  | Trajectory planning will use invalid                                                 | multiple testing,                                            | Use multiple sensors or multimodal, implement HRI on timer                   | no hazard |



|        |       |            |                                                                         |                                                                        |                                                                                   |                                                      |                                                                                                     |           |
|--------|-------|------------|-------------------------------------------------------------------------|------------------------------------------------------------------------|-----------------------------------------------------------------------------------|------------------------------------------------------|-----------------------------------------------------------------------------------------------------|-----------|
|        |       |            |                                                                         |                                                                        | information,<br>potential collision                                               | multiple<br>inputs                                   |                                                                                                     |           |
| UML 19 | R 94  | Late       | System believes<br>new user pose<br>needed (late)                       | CPU overloaded, sensor<br>latency                                      | User waiting                                                                      | set time limits<br>to maximum<br>wait period         | watchdog timers                                                                                     | annoyance |
| UML 19 | R 95  | Value      | Falsely believes<br>user is in correct<br>pose                          | Sensor failure, image<br>distortion                                    | Trajectory<br>planning will use<br>invalid<br>information,<br>potential collision | multiple<br>testing,<br>multiple<br>inputs           | Use multiple sensors or<br>multimodal, implement HRI on<br>timer                                    | high      |
| UML 20 | R 96  | Omission   | Stops the user<br>interaction/HRI                                       | Sensor failure, incorrect<br>interpretation                            | User confused, HRI<br>action not<br>complete                                      | Multimodal                                           | Check user attention and<br>intention through multimodal<br>inputs                                  | low       |
| UML 20 | R 97  | Commission | The robot stops<br>HRI mid-process                                      | Sensor failure, incorrect<br>interpretation                            | User confused, HRI<br>action not<br>complete                                      | Multimodal                                           | Check user attention and<br>intention through multimodal<br>inputs                                  | low       |
| UML 20 | R 98  | Early      | n/a                                                                     | n/a                                                                    | n/a                                                                               | n/a                                                  | n/a                                                                                                 | no hazard |
| UML 20 | R 99  | Late       | Robot HRI<br>interaction slow to<br>start                               | CPU overloaded, sensor<br>latency                                      | User distracted,<br>actions not taken<br>quickly enough                           | Multimodal                                           | Check user attention and<br>intention through multimodal<br>inputs                                  | low       |
| UML 20 | R 100 | Value      | The HRI interface<br>does not start                                     | Sensor failure, incorrect<br>interpretation                            | HRI interaction<br>does not start                                                 | Multimodal                                           | Check user attention and<br>intention through multimodal<br>inputs                                  | low       |
| UML 21 | R 101 | Omission   | Robot does not<br>perform trajectory<br>correction                      | Wrong sensor information,<br>incorrect interpretation                  | Robot does not<br>move or take<br>corrective action                               | Use<br>multimodal<br>inputs, check<br>user intention | Check user attention and<br>intention through multimodal<br>inputs                                  | high      |
| UML 21 | R 102 | Commission | Robot corrects a<br>valid trajectory or<br>pose                         | Wrong sensor information,<br>incorrect interpretation                  | Robot collides with<br>user                                                       | Use<br>multimodal<br>inputs, check<br>user intention | Check user attention and<br>intention through multimodal<br>inputs, check pose prior to<br>movement | high      |
| UML 21 | R 103 | Early      | Robot makes<br>trajectory/pose<br>correction during<br>normal operation | Wrong sensor information,<br>incorrect interpretation                  | Robot collides with<br>user                                                       | Use<br>multimodal<br>inputs, check<br>user intention | Check user attention and<br>intention through multimodal<br>inputs                                  | high      |
| UML 21 | R 104 | Late       | Robot corrects a<br>valid<br>trajectory/pose<br>with delay              | Wrong sensor information,<br>incorrect interpretation, CPU<br>overload | Robot collides with<br>user, user moves<br>around/impatient                       | Use<br>multimodal<br>inputs, check<br>user intention | Check user attention and<br>intention through multimodal<br>inputs                                  | high      |
| UML 21 | R 105 | Value      | Robot makes<br>wrong<br>trajectory/pose<br>correction                   | Wrong sensor information,<br>incorrect interpretation                  | Robot collides with<br>user                                                       | Use<br>multimodal<br>inputs, check<br>user intention | Check user attention and<br>intention through multimodal<br>inputs                                  | high      |

Table 5: Full hazard analysis results for human error common to any task segment.

# Appendix E):

For the hazard analysis of the robot's operation, where the focus is more on what errors the robot can encounter rather than the user, a different approach is taken. Here we include the UML flowchart based on the logical path of actions the robot may take, see Figure 4. At each point or node of the UML (identified with the reference UMLXX) we apply the rigorous technique of the SHARD analysis. This allows creating a correct control architecture and closing the control loop with appropriate sensing suite.

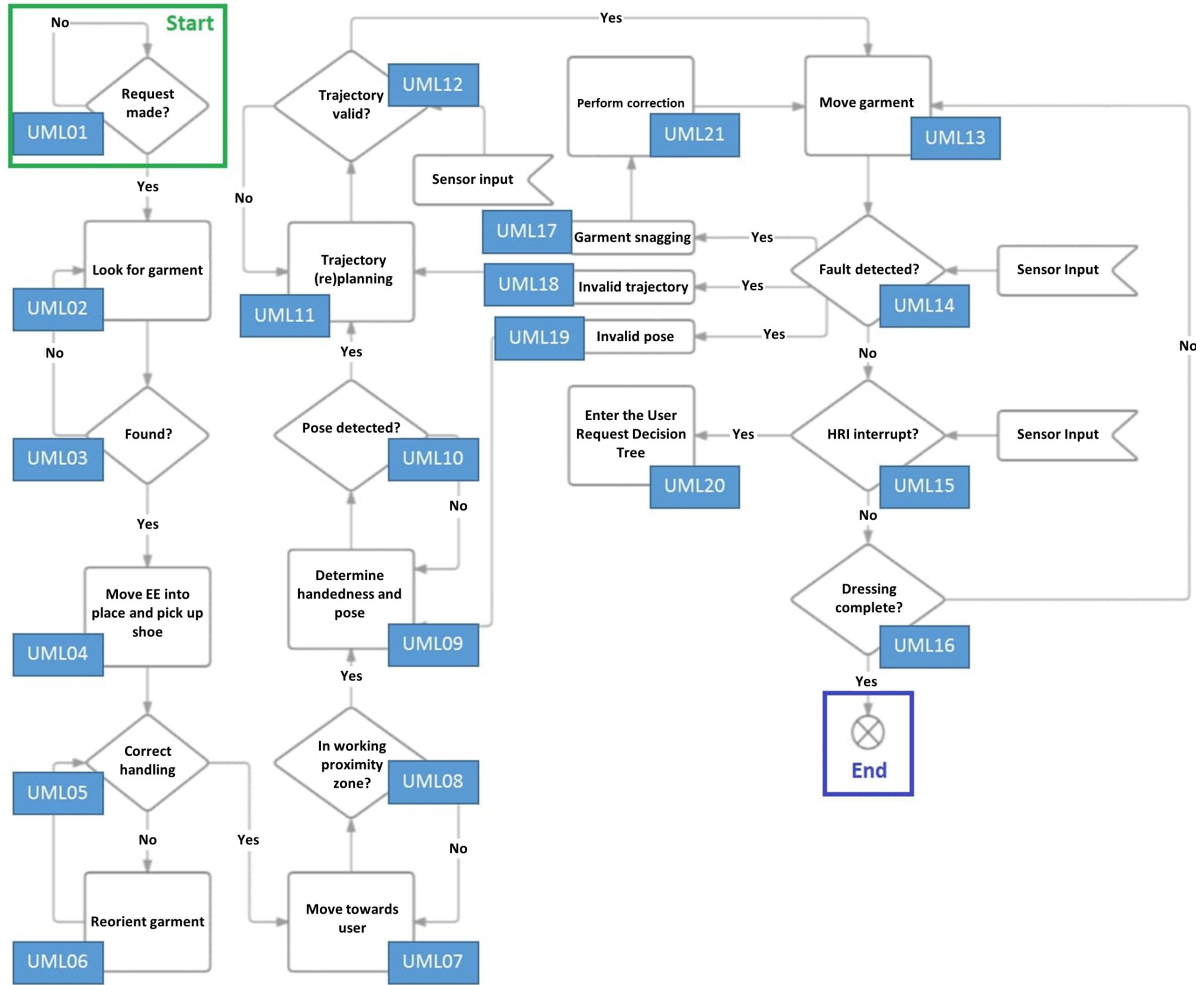

Figure 4: Generic dressing UML diagram with Hazard modules
